# Supplementary material for: A Probiotic Lactobacillus gasseri Alleviates Escherichia coli-Induced Cognitive Impairment and Depression in Mice by Regulating IL-1β Expression and Gut Microbiota
Source: PubMed Central journal article supplement (PMC7697804; doi:10.3390/nu12113441), 2020-11-10
Supplement: nutrients-12-03441-s001.pdf [file nutrients-12-03441-s001.pdf]

[Supplementary Material]

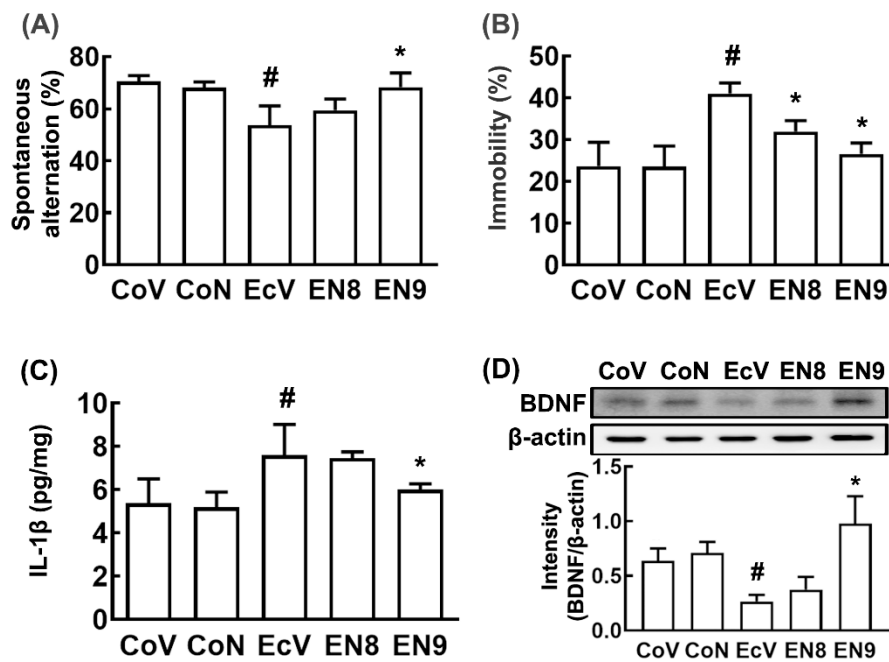

Figure S1. NK109 alleviated K1-induced cognitive impairment and depression in mice. (A) Effect on the memory impairment in Y-maze task. (B) Effect on the depressive behaviors in the TST (C). Effect on the IL-1 $\beta$  level in the hippocampus. (D) Effect on BDNF expression in the hippocampus. Mice of EcV, EN8, and EN9 groups were exposed to K1 ( $1 \times 10^9$  CFU/mouse/day) daily for 5 days and thereafter treated with test agents (EcV, vehicle; EN8,  $1 \times 10^8$  CFU/mouse/day of NK109; EN9,  $1 \times 10^9$  CFU/mouse/day of NK109) for 5 days. Control group (CoV) was treated with 1% maltose instead of K1 and NK109 and CoN group was treated with 1% maltose instead of K1 for 5 days and thereafter NK109 ( $1 \times 10^9$  CFU/mouse/day of NK109) was orally gavaged for t days. Data values were indicated as mean  $\pm$  SD (n = 6). Means with same letters are not significantly different ( $p < 0.05$ ).

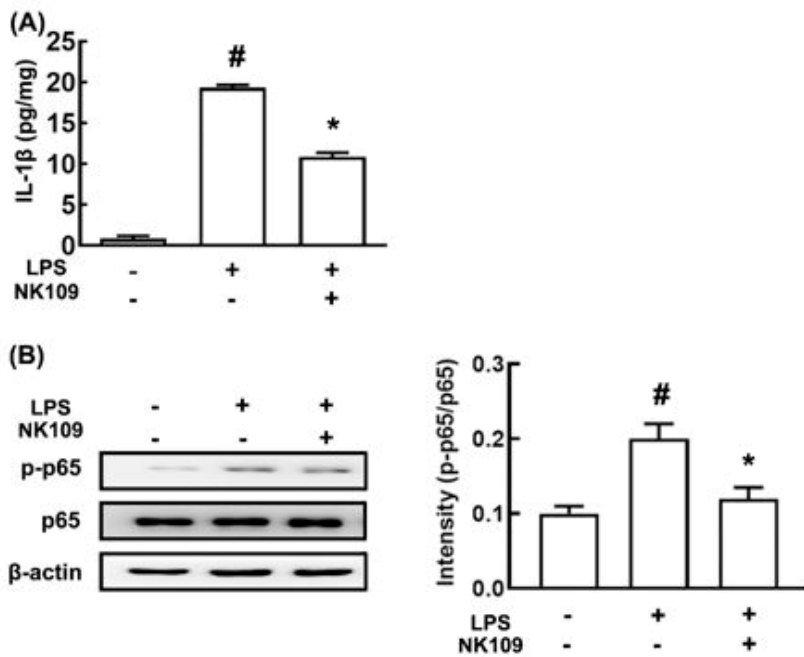

Figure S2. Effects of NK109 on the LPS-induced IL-1 $\beta$  and NF- $\kappa$ B activation in macrophages. Effect on IL-1 $\beta$  expression (A) and NF- $\kappa$ B activation (B) in macrophages. Peritoneal macrophage cells ( $1 \times 10^6$ /mL) were incubated with NK109 ( $1 \times 10^5$  CFU/mL) in the absence or presence of LPS (100 ng/mL) for 2 h (for NF- $\kappa$ B) or 20 h (for IL-1 $\beta$ ).

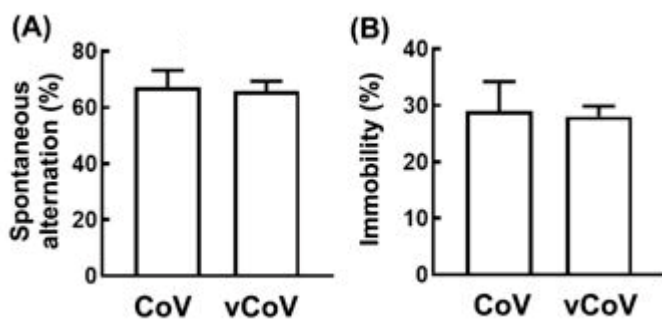

Figure S3. The difference in the cognitive impairment and depression-like behaviors between mice with and without celiac vagotomy. Cognitive impairment and depression-like behaviors were analyzed in the Y-maze task (A) and TST (B), respectively. Data values were indicated as

mean  $\pm$  SD (n = 6). Means with same letters are not significantly different (p < 0.05).

Table S1. P-values for experimental data in the present study

| Figure 1.<br>Unpaired t-test |                                   |           |
|------------------------------|-----------------------------------|-----------|
| (A) IL-1 $\beta$ (pg/mL)     | E.coli-/NK109- vs. E.coli+/NK109- | p=0.001   |
|                              | E.coli-/NK109- vs. E.coli+/NK109+ | p=0.001   |
|                              | E.coli+/NK109- vs. E.coli+/NK109+ | p=0.000   |
| (B) Intensity<br>p-p65/p65   | E.coli-/NK109- vs. E.coli+/NK109- | p <0.0001 |
|                              | E.coli-/NK109- vs. E.coli+/NK109+ | p <0.0001 |
|                              | E.coli+/NK109- vs. E.coli+/NK109+ | p <0.0001 |

| Figure 2.<br>Unpaired t-test            |             |           |
|-----------------------------------------|-------------|-----------|
| (A) Immobility (%)                      | CoV vs. EcV | p=0.001   |
|                                         | CoV vs ENK  | p=0.331   |
|                                         | EcV vs ENK  | p=0.003   |
| (B) Intensity<br>p-p65/p65              | CoV vs. EcV | p=0.005   |
|                                         | CoV vs ENK  | p=0.000   |
|                                         | EcV vs ENK  | p=0.021   |
| (B) Intensity<br>BDNF/ $\beta$ -actin   | CoV vs. EcV | p=0.008   |
|                                         | CoV vs ENK  | p=0.005   |
|                                         | EcV vs ENK  | p=0.001   |
| (C) IL-1 $\beta$ (pg/mg)                | CoV vs. EcV | p=0.000   |
|                                         | CoV vs ENK  | p=0.459   |
|                                         | EcV vs ENK  | p=0.002   |
| (D) cell count<br>BDNF+/NeuN+           | CoV vs. EcV | p<0.0001  |
|                                         | CoV vs ENK  | p<0.0001  |
|                                         | EcV vs ENK  | p=0.001   |
| (E) cell count<br>Iba1+/NK $\kappa$ B+  | CoV vs. EcV | p<0.0001  |
|                                         | CoV vs ENK  | p=0.868   |
|                                         | EcV vs ENK  | p<0.0001  |
| (F) cell count<br>IL-1R+                | CoV vs. EcV | p <0.0001 |
|                                         | CoV vs ENK  | p <0.0001 |
|                                         | EcV vs ENK  | p <0.0001 |
| (G) cell count<br>NK $\kappa$ B+/CD11c+ | CoV vs. EcV | p <0.0001 |
|                                         | CoV vs ENK  | p=0.984   |
|                                         | EcV vs ENK  | p <0.0001 |
| (H) MPO activity<br>( $\mu$ unit/mg)    | CoV vs. EcV | p=0.001   |
|                                         | CoV vs ENK  | p=0.737   |

|                            |             |         |
|----------------------------|-------------|---------|
|                            | EcV vs ENK  | p=0.003 |
| (I) IL-1 $\beta$ (pg/mg)   | CoV vs. EcV | p=0.005 |
|                            | CoV vs ENK  | p=0.941 |
|                            | EcV vs ENK  | p=0.003 |
| (J) Intensity<br>p-p65/p65 | CoV vs. EcV | p=0.005 |
|                            | CoV vs ENK  | p=0.476 |
|                            | EcV vs ENK  | p=0.002 |

|                                       |             |           |
|---------------------------------------|-------------|-----------|
| Figure 3.<br>Unpaired t-test          |             |           |
| (A) Spontaneous alternation (%)       | CoV vs. EcV | p=0.003   |
|                                       | CoV vs ENK  | p=0.192   |
|                                       | EcV vs ENK  | p=0.000   |
| (B) Immobility (%)                    | CoV vs. EcV | p=0.023   |
|                                       | CoV vs ENK  | p=0.063   |
|                                       | EcV vs ENK  | p=0.000   |
| (C) Immobility (%)                    | CoV vs. EcV | p=0.001   |
|                                       | CoV vs ENK  | p=0.026   |
|                                       | EcV vs ENK  | p=0.025   |
| (D) IL-1 $\beta$ (pg/mg)              | CoV vs. EcV | p=0.393   |
|                                       | CoV vs ENK  | p=0.016   |
|                                       | EcV vs ENK  | p=0.028   |
| (E) IL-6 (pg/mg)                      | CoV vs. EcV | p=0.370   |
|                                       | CoV vs ENK  | p=0.001   |
|                                       | EcV vs ENK  | p=0.030   |
| (F) Intensity<br>p-p65/p65            | CoV vs. EcV | p <0.0001 |
|                                       | CoV vs ENK  | p <0.0001 |
|                                       | EcV vs ENK  | p <0.0001 |
| (F) Intensity<br>p-CREB/CREB          | CoV vs. EcV | p=0.005   |
|                                       | CoV vs ENK  | p=0.289   |
|                                       | EcV vs ENK  | p=0.072   |
| (F) Intensity<br>BDNF/ $\beta$ -actin | CoV vs. EcV | p=0.000   |
|                                       | CoV vs ENK  | p=0.930   |
|                                       | EcV vs ENK  | p=0.001   |
| (G) Intensity<br>BDNF+/NeuN+          | CoV vs. EcV | p<0.0001  |
|                                       | CoV vs ENK  | p=0.000   |
|                                       | EcV vs ENK  | p=0.001   |
| (H) Intensity<br>Iba1+/NK $\kappa$ B+ | CoV vs. EcV | P<0.0001  |
|                                       | CoV vs ENK  | p=0.967   |
|                                       | EcV vs ENK  | P<0.0001  |
| (I) Intensity<br>IL-1R+               | CoV vs. EcV | p<0.0001  |
|                                       | CoV vs ENK  | p<0.0001  |
|                                       | EcV vs ENK  | p<0.0001  |
| (J) CORT (mg/mL)                      | CoV vs. EcV | p <0.0001 |
|                                       | CoV vs ENK  | p <0.0001 |
|                                       | EcV vs ENK  | p <0.0001 |

|                                       |               |         |
|---------------------------------------|---------------|---------|
| (K) IL-6 (pg/mL)                      | CoV vs. EcV   | p=0.006 |
|                                       | CoV vs ENK    | p=0.006 |
|                                       | EcV vs ENK    | p=0.074 |
| (L) Spontaneous alternation (%)       | vCoV vs. vEcV | p=0.005 |
|                                       | vCoV vs vENK  | p=0.025 |
|                                       | vEcV vs vENK  | p=0.193 |
| (M) Immobility (%)                    | vCoV vs. vEcV | p=0.000 |
|                                       | vCoV vs vENK  | p=0.274 |
|                                       | vEcV vs vENK  | p=0.072 |
| (N) Intensity<br>p-CREB/CREB          | vCoV vs. vEcV | p=0.002 |
|                                       | vCoV vs vENK  | p=0.055 |
|                                       | vEcV vs vENK  | p=0.045 |
| (N) Intensity<br>BDNF/ $\beta$ -actin | vCoV vs. vEcV | p=0.039 |
|                                       | vCoV vs vENK  | p=0.456 |
|                                       | vEcV vs vENK  | p=0.110 |

|                                         |             |           |
|-----------------------------------------|-------------|-----------|
| Figure 4.<br>Unpaired t-test            |             |           |
| (A) Colon length (cm)                   | CoV vs. EcV | p=0.000   |
|                                         | CoV vs ENK  | p=0.264   |
|                                         | EcV vs ENK  | p=0.009   |
| (B) MPO activity<br>( $\mu$ unit/mg)    | CoV vs. EcV | p=0.003   |
|                                         | CoV vs ENK  | p=0.763   |
|                                         | EcV vs ENK  | p=0.008   |
| (C) IL-1 $\beta$ (pg/mg)                | CoV vs. EcV | p=0.768   |
|                                         | CoV vs ENK  | p=0.007   |
|                                         | EcV vs ENK  | p=0.003   |
| (D) IL-6 (pg/mg)                        | CoV vs. EcV | P0.012    |
|                                         | CoV vs ENK  | p=0.202   |
|                                         | EcV vs ENK  | p=0.029   |
| (E) TNF- $\alpha$ (pg/mg)               | CoV vs. EcV | p <0.0001 |
|                                         | CoV vs ENK  | p <0.0001 |
|                                         | EcV vs ENK  | p <0.0001 |
| (F) Intensity<br>p-p65/p65              | CoV vs. EcV | p=0.024   |
|                                         | CoV vs ENK  | p=0.277   |
|                                         | EcV vs ENK  | p=0.002   |
| (G) cell count<br>NK $\kappa$ B+/CD11c+ | CoV vs. EcV | P<0.0001  |
|                                         | CoV vs ENK  | p=0.005   |
|                                         | EcV vs ENK  | P<0.0001  |
| (I) OTUs                                | CoV vs. EcV | p=0.757   |
|                                         | CoV vs ENK  | p=0.101   |
|                                         | EcV vs ENK  | p=0.559   |
| (I) Shannon                             | CoV vs. EcV | p=0.456   |
|                                         | CoV vs ENK  | p=0.435   |
|                                         | EcV vs ENK  | p=0.229   |

| Figure 5.<br>Unpaired t-test                        |              |             |              |
|-----------------------------------------------------|--------------|-------------|--------------|
| <b>(A) Spontaneous alternation (%)</b>              |              |             |              |
| CoV vs. EcV                                         | p=0.001      | EcV vs. ENC | p=0.01       |
| CoV vs. EtN                                         | p=0.761      | EcV vs. ENM | p=0.001      |
| CoV vs. ENC                                         | p=0.327      | EtN vs. ENC | p=0.567      |
| CoV vs. ENM                                         | p=0.748      | EtN vs. ENM | p=0.587      |
| EcV vs. EtN                                         | p=0.005      | ENC vs. ENM | p=0.208      |
| <b>(B) Immobility (%)</b>                           |              |             |              |
| CoV vs. EcV                                         | p <0.0001    | EcV vs. ENC | p <0.0001    |
| CoV vs. EtN                                         | p=0.001      | EcV vs. ENM | p <0.0001    |
| CoV vs. ENC                                         | p=0.002      | EtN vs. ENC | p=0.619      |
| CoV vs. ENM                                         | p=0.286      | EtN vs. ENM | p=0.040      |
| EcV vs. EtN                                         | p <0.0001    | ENC vs. ENM | p=0.022      |
| <b>(C) Immobility (%)</b>                           |              |             |              |
| CoV vs. EcV                                         | p <0.0001    | EcV vs. ENC | p <0.0001    |
| CoV vs. EtN                                         | p=0.001      | EcV vs. ENM | p <0.0001    |
| CoV vs. ENC                                         | p=0.000      | EtN vs. ENC | p=0.186      |
| CoV vs. ENM                                         | p=0.166      | EtN vs. ENM | p=0.107      |
| EcV vs. EtN                                         | p <0.0001    | ENC vs. ENM | p=0.019      |
| <b>(D) IL-1<math>\beta</math> (pg/mg)</b>           |              |             |              |
| CoV vs. EcV                                         | p=0.000      | EcV vs. ENC | p=0.047      |
| CoV vs. EtN                                         | p=0.006      | EcV vs. ENM | p=0.002      |
| CoV vs. ENC                                         | p=0.000      | EtN vs. ENC | p=0.102      |
| CoV vs. ENM                                         | p=0.018      | EtN vs. ENM | p=0.044      |
| EcV vs. EtN                                         | p=0.006      | ENC vs. ENM | p=0.005      |
| <b>(E) IL-6 (pg/mg)</b>                             |              |             |              |
| CoV vs. EcV                                         | p <0.0001    | EcV vs. ENC | p= p <0.0001 |
| CoV vs. EtN                                         | p <0.0001    | EcV vs. ENM | p= p <0.0001 |
| CoV vs. ENC                                         | p <0.0001    | EtN vs. ENC | p= p <0.0001 |
| CoV vs. ENM                                         | p <0.0001    | EtN vs. ENM | p= p <0.0001 |
| EcV vs. EtN                                         | p <0.0001    | ENC vs. ENM | p= p <0.0001 |
| <b>(F) Intensity p-p65/p65</b>                      |              |             |              |
| CoV vs. EcV                                         | p= p <0.0001 | EcV vs. ENC | p= p <0.0001 |
| CoV vs. EtN                                         | p=0.001      | EcV vs. ENM | p= p <0.0001 |
| CoV vs. ENC                                         | p=0.000      | EtN vs. ENC | p=0.020      |
| CoV vs. ENM                                         | p=0.017      | EtN vs. ENM | p=0.030      |
| EcV vs. EtN                                         | p= p <0.0001 | ENC vs. ENM | p=0.001      |
| <b>(F) Intensity p-CREB/CREB</b>                    |              |             |              |
| CoV vs. EcV                                         | p=0.023      | EcV vs. ENC | p=0.001      |
| CoV vs. EtN                                         | p=0.203      | EcV vs. ENM | p=0.000      |
| CoV vs. ENC                                         | p=0.011      | EtN vs. ENC | p=0.064      |
| CoV vs. ENM                                         | p=0.001      | EtN vs. ENM | p=0.008      |
| EcV vs. EtN                                         | p=0.004      | ENC vs. ENM | p=0.343      |
| <b>(F) Intensity BDNF/ <math>\beta</math>-actin</b> |              |             |              |
| CoV vs. EcV                                         | p=0.011      | EcV vs. ENC | p=0.003      |
| CoV vs. EtN                                         | p=0.017      | EcV vs. ENM | p=0.005      |

|                                                        |           |             |           |
|--------------------------------------------------------|-----------|-------------|-----------|
| CoV vs. ENC                                            | p=0.010   | EtN vs. ENC | p=0.815   |
| CoV vs. ENM                                            | p=0.005   | EtN vs. ENM | p=0.061   |
| EcV vs. EtN                                            | p=0.004   | ENC vs. ENM | p=0.074   |
| <b>(G) Intensity BDNF<sup>+</sup>/NeuN<sup>+</sup></b> |           |             |           |
| CoV vs. EcV                                            | p<0.0001  | EcV vs. ENC | p<0.0001  |
| CoV vs. EtN                                            | p<0.0001  | EcV vs. ENM | p<0.0001  |
| CoV vs. ENC                                            | p<0.0001  | EtN vs. ENC | p=0.860   |
| CoV vs. ENM                                            | p<0.0001  | EtN vs. ENM | p=0.004   |
| EcV vs. EtN                                            | p<0.0001  | ENC vs. ENM | p=0.040   |
| <b>(H) Intensity Iba1<sup>+</sup>/NKκB<sup>+</sup></b> |           |             |           |
| CoV vs. EcV                                            | p<0.0001  | EcV vs. ENC | p=0.000   |
| CoV vs. EtN                                            | p<0.0001  | EcV vs. ENM | p<0.0001  |
| CoV vs. ENC                                            | p<0.0001  | EtN vs. ENC | p=0.918   |
| CoV vs. ENM                                            | p=0.002   | EtN vs. ENM | p=0.000   |
| EcV vs. EtN                                            | p<0.0001  | ENC vs. ENM | p<0.0001  |
| <b>(I) Intensity IL-1R</b>                             |           |             |           |
| CoV vs. EcV                                            | p<0.0001  | EcV vs. ENC | p=0.000   |
| CoV vs. EtN                                            | p<0.0001  | EcV vs. ENM | p<0.0001  |
| CoV vs. ENC                                            | p<0.0001  | EtN vs. ENC | p=0.622   |
| CoV vs. ENM                                            | p<0.0001  | EtN vs. ENM | p=0.001   |
| EcV vs. EtN                                            | p<0.0001  | ENC vs. ENM | p<0.0001  |
| <b>(J) CORT (mg/mL)</b>                                |           |             |           |
| CoV vs. EcV                                            | p <0.0001 | EcV vs. ENC | p <0.0001 |
| CoV vs. EtN                                            | p <0.0001 | EcV vs. ENM | p <0.0001 |
| CoV vs. ENC                                            | p <0.0001 | EtN vs. ENC | p <0.0001 |
| CoV vs. ENM                                            | p <0.0001 | EtN vs. ENM | p <0.0001 |
| EcV vs. EtN                                            | p <0.0001 | ENC vs. ENM | p <0.0001 |
| <b>(K) IL-6 (pg/mL)</b>                                |           |             |           |
| CoV vs. EcV                                            | p <0.0001 | EcV vs. ENC | p <0.0001 |
| CoV vs. EtN                                            | p <0.0001 | EcV vs. ENM | p <0.0001 |
| CoV vs. ENC                                            | p <0.0001 | EtN vs. ENC | p <0.0001 |
| CoV vs. ENM                                            | p <0.0001 | EtN vs. ENM | p <0.0001 |
| EcV vs. EtN                                            | p <0.0001 | ENC vs. ENM | p <0.0001 |

|                                    |           |             |         |
|------------------------------------|-----------|-------------|---------|
| <b>Figure 6.</b>                   |           |             |         |
| <b>Unpaired t-test</b>             |           |             |         |
| <b>(A) Colon length (cm)</b>       |           |             |         |
| CoV vs. EcV                        | p=0.001   | EcV vs. ENC | p=0.135 |
| CoV vs. EtN                        | p=0.021   | EcV vs. ENM | p=0.003 |
| CoV vs. ENC                        | p=0.003   | EtN vs. ENC | p=0.049 |
| CoV vs. ENM                        | p=0.087   | EtN vs. ENM | p=0.152 |
| EcV vs. EtN                        | p=0.010   | ENC vs. ENM | p=0.009 |
| <b>(B) MPO activity (μunit/mg)</b> |           |             |         |
| CoV vs. EcV                        | p <0.0001 | EcV vs. ENC | p=0.013 |
| CoV vs. EtN                        | p <0.0001 | EcV vs. ENM | p=0.015 |
| CoV vs. ENC                        | p <0.0001 | EtN vs. ENC | p=0.062 |

|                                                  |           |             |           |
|--------------------------------------------------|-----------|-------------|-----------|
| CoV vs. ENM                                      | p=0.005   | EtN vs. ENM | p=0.141   |
| EcV vs. EtN                                      | p=0.004   | ENC vs. ENM | p=0.019   |
| (C) IL-1 $\beta$ (pg/mg)                         |           |             |           |
| CoV vs. EcV                                      | p=0.012   | EcV vs. ENC | p=0.035   |
| CoV vs. EtN                                      | p=0.031   | EcV vs. ENM | p=0.028   |
| CoV vs. ENC                                      | p=0.011   | EtN vs. ENC | p=0.361   |
| CoV vs. ENM                                      | p=0.139   | EtN vs. ENM | p=0.710   |
| EcV vs. EtN                                      | p=0.019   | ENC vs. ENM | p=0.356   |
| (D) IL-6 (pg/mg)                                 |           |             |           |
| CoV vs. EcV                                      | p=0.003   | EcV vs. ENC | p=0.033   |
| CoV vs. EtN                                      | p=0.001   | EcV vs. ENM | p=0.01    |
| CoV vs. ENC                                      | p=0.000   | EtN vs. ENC | p=0.048   |
| CoV vs. ENM                                      | p=0.060   | EtN vs. ENM | p=0.009   |
| EcV vs. EtN                                      | p=0.010   | ENC vs. ENM | p=0.000   |
| (E) TNF- $\alpha$ (pg/mg)                        |           |             |           |
| CoV vs. EcV                                      | p <0.0001 | EcV vs. ENC | p <0.0001 |
| CoV vs. EtN                                      | p=0.000   | EcV vs. ENM | p <0.0001 |
| CoV vs. ENC                                      | p=0.000   | EtN vs. ENC | p=0.012   |
| CoV vs. ENM                                      | p=0.019   | EtN vs. ENM | p=0.296   |
| EcV vs. EtN                                      | p <0.0001 | ENC vs. ENM | p=0.006   |
| (F) Intensity p-p65/p65                          |           |             |           |
| CoV vs. EcV                                      | p <0.0001 | EcV vs. ENC | p= 0.114  |
| CoV vs. EtN                                      | p <0.0001 | EcV vs. ENM | p= 0.000  |
| CoV vs. ENC                                      | p= 0.000  | EtN vs. ENC | p= 0.017  |
| CoV vs. ENM                                      | p= 0.461  | EtN vs. ENM | p= 0.002  |
| EcV vs. EtN                                      | p= 0.000  | ENC vs. ENM | p= 0.001  |
| (G) NK $\kappa$ B+/CD11c <sup>+</sup> cell count |           |             |           |
| CoV vs. EcV                                      | p<0.0001  | EcV vs. ENC | p<0.0001  |
| CoV vs. EtN                                      | p<0.0001  | EcV vs. ENM | p<0.0001  |
| CoV vs. ENC                                      | p<0.0001  | EtN vs. ENC | p=0.995   |
| CoV vs. ENM                                      | p=0.003   | EtN vs. ENM | p=0.013   |
| EcV vs. EtN                                      | p<0.0001  | ENC vs. ENM | p=0.033   |

Table S2. Effect of NK109 on the gut microbiota composition at the family level in EC- treated mice

| Taxon Name          | AVE    |                     |         | STD    |        |        |
|---------------------|--------|---------------------|---------|--------|--------|--------|
|                     | CoV    | EcV                 | ENK     | CoV    | EcV    | ENK    |
| AC160630 f          | 0.155  | 1.481               | 0.003*  | 0.242  | 1.686  | 0.005  |
| Bacteroidaceae      | 23.106 | 10.770              | 31.359* | 13.398 | 2.204  | 13.755 |
| Christensenellaceae | 0.688  | 1.434 <sup>#</sup>  | 0.575*  | 0.469  | 0.530  | 0.427  |
| Desulfovibrionaceae | 0.085  | 1.087 <sup>#</sup>  | 0.001*  | 0.133  | 0.517  | 0.004  |
| Enterobacteriaceae  | 0.002  | 1.306 <sup>#</sup>  | 0.006*  | 0.005  | 0.503  | 0.010  |
| FR888536 f          | 0.066  | 4.523 <sup>#</sup>  | 0.003*  | 0.147  | 4.466  | 0.005  |
| Helicobacteraceae   | 3.428  | 13.638              | 0.046*  | 8.369  | 15.187 | 0.031  |
| Lachnospiraceae     | 29.627 | 18.665              | 11.590  | 11.283 | 13.388 | 5.846  |
| Muribaculaceae      | 30.006 | 14.061 <sup>#</sup> | 38.197* | 12.448 | 7.761  | 15.214 |



|                    |       |                    |        |       |        |       |
|--------------------|-------|--------------------|--------|-------|--------|-------|
| Porphyromonadaceae | 0.187 | 1.655 <sup>#</sup> | 0.461* | 0.121 | 0.762  | 0.157 |
| Prevotellaceae     | 0.129 | 9.461 <sup>#</sup> | 4.698  | 0.171 | 7.194  | 2.283 |
| Rhodospirillaceae  | 0.011 | 9.763 <sup>#</sup> | 0.864* | 0.023 | 10.190 | 0.665 |
| Rikenellaceae      | 2.722 | 2.452              | 1.216  | 0.513 | 1.972  | 1.077 |
| Ruminococcaceae    | 7.447 | 6.512              | 8.078  | 3.553 | 1.595  | 2.457 |

CoV, treated with vehicle alone; EcV, treated with K1 alone; ENK, treated with NK109 in the presence of EK. <sup>#</sup> $p < 0.05$  vs. CoV group. \* $p < 0.05$  vs. EcV group.

Table S3. Effect of NK109 on the gut microbiota composition at the genus level in EC- treated mice

| Taxon Name           | AVE    |                    |         | STD    |        |        |
|----------------------|--------|--------------------|---------|--------|--------|--------|
|                      | CoV    | EcV                | ENK     | CoV    | EcV    | ENK    |
| Alistipes            | 2.707  | 2.396              | 1.211   | 0.529  | 1.963  | 1.075  |
| Alloprevotella       | 0.000  | 2.540              | 0.000*  | 0.000  | 3.228  | 0.000  |
| Bacteroides          | 22.249 | 10.770             | 30.140* | 12.762 | 2.204  | 12.933 |
| FR888536_g           | 0.066  | 4.523 <sup>#</sup> | 0.003*  | 0.147  | 4.466  | 0.005  |
| Helicobacter         | 3.397  | 13.637             | 0.046*  | 8.292  | 15.184 | 0.031  |
| KE159538_g           | 17.651 | 6.003              | 2.755   | 14.064 | 7.081  | 3.113  |
| LARJ_g               | 0.010  | 9.721 <sup>#</sup> | 0.733*  | 0.024  | 10.140 | 0.617  |
| Muribaculaceae_uc    | 1.986  | 0.348 <sup>#</sup> | 1.829*  | 1.144  | 0.402  | 0.582  |
| Oscillibacter        | 2.063  | 1.207              | 1.582   | 1.457  | 0.607  | 0.872  |
| PAC000186_g          | 6.900  | 2.431 <sup>#</sup> | 0.022*  | 3.778  | 1.051  | 0.009  |
| PAC000198_g          | 1.949  | 0.687 <sup>#</sup> | 2.728*  | 1.082  | 0.351  | 1.688  |
| PAC001063_g          | 11.953 | 0.080 <sup>#</sup> | 20.084* | 8.163  | 0.087  | 14.370 |
| PAC001066_g          | 2.926  | 1.048              | 8.304*  | 2.236  | 0.636  | 1.598  |
| PAC001068_g          | 1.459  | 2.289              | 1.674   | 2.159  | 1.014  | 0.576  |
| PAC001074_g          | 0.251  | 3.707 <sup>#</sup> | 0.020*  | 0.433  | 3.440  | 0.037  |
| PAC001228_g          | 0.609  | 2.440              | 1.305   | 0.944  | 2.186  | 1.326  |
| Paraprevotella       | 0.021  | 3.258 <sup>#</sup> | 0.001*  | 0.047  | 1.750  | 0.004  |
| Prevotella           | 0.108  | 1.173 <sup>#</sup> | 4.474*  | 0.141  | 1.108  | 2.173  |
| Prevotellaceae_uc    | 0.000  | 2.490              | 0.222   | 0.000  | 3.091  | 0.116  |
| Pseudoflavonifractor | 2.155  | 1.552              | 1.573   | 0.991  | 0.732  | 0.756  |

CoV, treated with vehicle alone; EcV, treated with K1 alone; ENK, treated with NK109 in the presence of EK. <sup>#</sup> $p < 0.05$  vs. CoV group. \* $p < 0.05$  vs. EcV group.

Table S4. Effect of NK109 on the gut microbiota composition at the species level in EC- treated mice.

| Taxon Name                     | AVE    |                    |         | STD    |        |        |
|--------------------------------|--------|--------------------|---------|--------|--------|--------|
|                                | CoV    | EcV                | ENK     | CoV    | EcV    | ENK    |
| AB599946_s                     | 0.559  | 5.156 <sup>#</sup> | 0.024*  | 1.343  | 2.817  | 0.013  |
| Bacteroides acidifaciens group | 0.675  | 2.918              | 0.009*  | 1.180  | 2.185  | 0.013  |
| Bacteroides caccae             | 0.773  | 0.009 <sup>#</sup> | 2.016*  | 0.764  | 0.009  | 0.659  |
| Bacteroides_uc                 | 19.745 | 0.404 <sup>#</sup> | 27.616* | 13.955 | 0.434  | 12.244 |
| FJ880724_s                     | 0.021  | 3.207 <sup>#</sup> | 0.001*  | 0.047  | 1.713  | 0.004  |
| Helicobacter japonicus         | 2.418  | 8.887              | 0.030   | 5.909  | 12.551 | 0.020  |
| Helicobacter rodentium group   | 0.298  | 4.642 <sup>#</sup> | 0.016*  | 0.716  | 2.910  | 0.014  |

|                   |        |                    |         |        |       |       |
|-------------------|--------|--------------------|---------|--------|-------|-------|
| KE159538 g uc     | 10.402 | 3.913              | 0.240   | 16.073 | 7.348 | 0.318 |
| LARJ g uc         | 0.000  | 3.490              | 0.111   | 0.000  | 5.577 | 0.143 |
| PAC000186 g uc    | 2.303  | 0.044 <sup>#</sup> | 0.000*  | 1.564  | 0.023 | 0.000 |
| PAC001063 g uc    | 4.795  | 0.002 <sup>#</sup> | 8.532*  | 3.459  | 0.005 | 6.340 |
| PAC001063 s group | 7.158  | 0.078 <sup>#</sup> | 11.552* | 4.728  | 0.086 | 8.041 |
| PAC001066 g uc    | 1.133  | 0.043 <sup>#</sup> | 3.767*  | 0.984  | 0.039 | 0.705 |
| PAC001066 s       | 1.793  | 1.004              | 4.538*  | 1.261  | 0.599 | 0.912 |
| PAC001074 s       | 0.176  | 2.620 <sup>#</sup> | 0.018*  | 0.312  | 2.571 | 0.030 |
| PAC001114 s       | 0.008  | 0.128 <sup>#</sup> | 1.674*  | 0.013  | 0.067 | 0.948 |
| PAC001120 s       | 5.357  | 1.012              | 0.888   | 8.282  | 2.332 | 1.372 |
| PAC001267 s       | 0.097  | 0.092              | 1.424*  | 0.137  | 0.026 | 0.661 |
| PAC001483 s       | 2.393  | 0.005 <sup>#</sup> | 0.001   | 1.875  | 0.002 | 0.004 |
| PAC001797 s       | 0.000  | 2.584              | 0.002   | 0.000  | 3.787 | 0.004 |
| PAC001927 s       | 0.000  | 3.528              | 0.000   | 0.000  | 4.773 | 0.000 |
| PAC002479 s       | 0.000  | 2.501              | 0.000*  | 0.000  | 3.169 | 0.000 |
| PAC002481 s       | 0.052  | 0.027              | 3.261*  | 0.115  | 0.058 | 1.576 |
| PAC002482 s group | 0.041  | 1.455              | 0.003*  | 0.101  | 1.693 | 0.005 |

CoV, treated with vehicle alone; EcV, treated with K1 alone; ENK, treated with NK109 in the presence of EK. <sup>#</sup> $p < 0.05$  vs. CoV group. \* $p < 0.05$  vs. EcV group.
